# Supplementary material for: A novel electrochemical sensor based on CuFe 2 O 4 /γ-CD loaded reduced graphene oxide nanocomposites: enabling the detection of metformin in water and soil
Source: Royal Society of Chemistry journal article supplement (doi:10.1039/d5nj03572d), 2026-01-01
Supplement: d5nj03572d1.pdf [file d5nj03572d1.pdf]

## Supporting Information

### **A novel electrochemical sensor based on CuFe<sub>2</sub>O<sub>4</sub>/γ-CD loaded reduced graphene oxide nanocomposites: enabling the detection of metformin in water and soil**

**Wenwen Yi <sup>a,b</sup>, Hua Liu <sup>a</sup>, Yunpeng Wang <sup>b</sup>, Jun Ma <sup>\*a</sup>, Zhongping Li <sup>\*b</sup>**

*<sup>a</sup>School of Environment and Resources, School of Chemical Engineering and Technology, Taiyuan University of Science and Technology, Taiyuan 030024, China*

*<sup>b</sup> Institute of Environmental Science and Shanxi Laboratory for Yellow River, Shanxi University, Taiyuan 030006, China.*

*\*Corresponding author: Zhongping Li, Jun Ma*

*Email address: [zl1104@sxu.edu.cn](mailto:zl1104@sxu.edu.cn), [Junma0888@126.com](mailto:Junma0888@126.com)*

#### **1. Reagents and apparatus**

Ferric nitrate (Fe(NO<sub>3</sub>)<sub>3</sub>), copper nitrate (Cu(NO<sub>3</sub>)<sub>2</sub>·3H<sub>2</sub>O), sodium hydroxide (NaOH), potassium permanganate (KMnO<sub>4</sub>), γ-Cyclodextrin (C<sub>48</sub>H<sub>80</sub>O<sub>40</sub>, ≥ 98%) were procured from Aladdin Reagent Co.,Ltd (Shanghai, China). NaNO<sub>3</sub>, hydrogen peroxide (H<sub>2</sub>O<sub>2</sub>), Sulfuric acid (H<sub>2</sub>SO<sub>4</sub>, 98%), H<sub>3</sub>PO<sub>4</sub> (85%), CH<sub>3</sub>COOH (36%), H<sub>3</sub>BO<sub>3</sub>, Metformin (C<sub>4</sub>H<sub>11</sub>N<sub>5</sub>) were supplied from Macklin Biochemical Co.,Ltd (Shanghai, China). Graphite powder was procured from Tianjin Reagent Factory. All reagents used in this research are analytically grade. Ultrapure water (18.2 MΩ) was used throughout the whole experiments. The working buffer was 0.1 M Britton-Robinson (B-R) buffer with various pH in the present study.

TEM was recorded on JEM-2100 (JEOL, Japan) for the characterization of nanomaterials. The Fourier transform infrared (FT-IR) spectra were obtained on TENSOR II infrared spectrometer (Bruker Germany). X-ray photoelectron spectroscopy (XPS) of as-prepared sample was obtained on a Thermo Scientific, ESCALAB 250Xi with Al K $\alpha$  radiation (USA). UV-vis spectra were carried out on a Perkin Elmer, Lambda 950 UV-vis spectrophotometer. All electrochemical measurements were performed on a CHI760E electrochemical work-station (Shanghai Chenhua Instrument co., China) with a three-electrode system comprising a bare GCE (3 mm) or the as-prepared materials covered GCE as the working electrodes, a saturated Ag/AgCl (saturated KCl) as the reference electrode, and a Pt wires as the auxiliary electrode.

## **2. Synthesis of CuFe<sub>2</sub>O<sub>4</sub>/rGO**

1 mmol of Fe(NO<sub>3</sub>)<sub>3</sub> and 0.5 mmol of Cu(NO<sub>3</sub>)<sub>2</sub>·3H<sub>2</sub>O were dissolved in ultrapure water (25 mL) separately and sonicated for 15 min. Subsequently, the metal salt solutions were mixed and again was sonicated for the next 15 min. Thereafter the 2 mg/mL GO solution (10 mL) was added drop by drop to the metal salt mixed solution. The mixture was adjusted to a pH of 12.0 with 6 M freshly prepared NaOH solution and sonicated again for 30 min, at room temperature, yielding a stable bottle homogeneous emulsion. Then the resulting mixture was maintained at T = 80°C, while being stirred magnetically, for 2.5 h. The black reaction dispersion was allowed to cool to room temperature, and the precipitate was centrifuged and washed with redistilled water three times. The product was finally resuspended in deionized water to obtain 1 mg·mL<sup>-1</sup>. The synthesis of CuFe<sub>2</sub>O<sub>4</sub> is the same as the above method.

### **Randles equivalent circuit**

R<sub>ct</sub> is the charge transfer the resistance that reflects the blocking behavior of the electrode interface, C is the differential capacitance, Z<sub>w</sub> is the Warburg impedance, and R<sub>s</sub> is Solution phase resistance.

The chemical structures of graphite, GO, and rGO were characterized using FT-IR spectroscopy (Figure S1 (A)). The graphite precursor exhibited only weak absorption peaks at 1648  $\text{cm}^{-1}$  and 3438  $\text{cm}^{-1}$ , attributed to the C=C vibration of its  $\text{sp}^2$  carbon skeleton and the O-H vibration of adsorbed water, respectively. After oxidation treatment, GO showed significant characteristic peaks at 1724  $\text{cm}^{-1}$ , 1628  $\text{cm}^{-1}$ , 1399  $\text{cm}^{-1}$ , and 1058  $\text{cm}^{-1}$ , corresponding to the stretching vibrations of C=O, C=C, C-OH, and C-O bonds, respectively, along with a broad O-H absorption peak at 3395  $\text{cm}^{-1}$ <sup>[1]</sup>. These findings collectively confirm the successful introduction of a substantial number of oxygen-containing functional groups. After reduction, the infrared absorption peaks observed for rGO at 3423  $\text{cm}^{-1}$ , 1746  $\text{cm}^{-1}$ , 1184  $\text{cm}^{-1}$ , and 1400  $\text{cm}^{-1}$  are primarily attributed to the stretching vibrations of O-H, C=O, C-O, and C-OH, respectively<sup>[2]</sup>. However, the significant decrease in intensity of peaks such as those at 1746  $\text{cm}^{-1}$  and 1184  $\text{cm}^{-1}$  indicates the effective removal of most oxygen-containing functional groups.

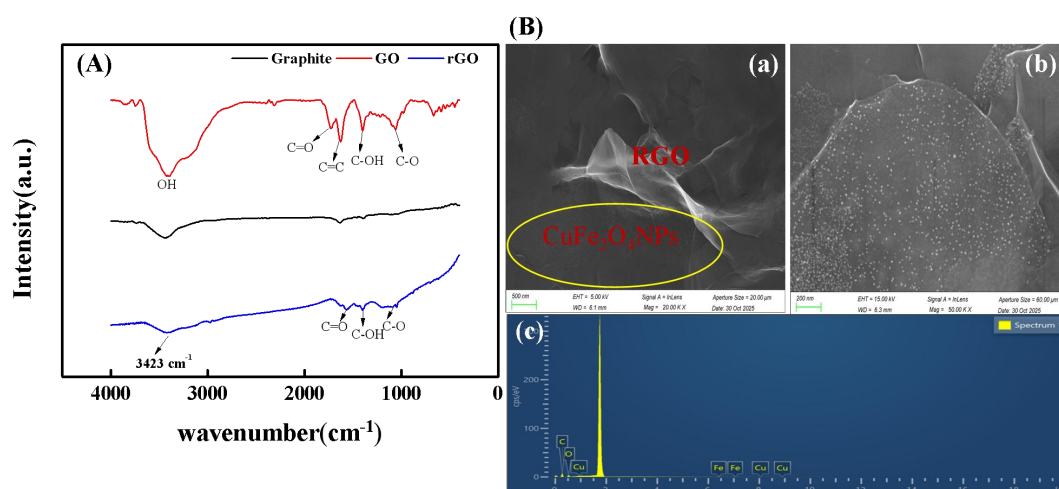

Fig. S1 (A) FT-IR spectra of graphite, GO, and rGO. (B) SEM images of CuFe<sub>2</sub>O<sub>4</sub>/rGO/γ-CD and EDS spectra.

Table. S1 C/O Ratio Analysis of CuFe<sub>2</sub>O<sub>4</sub>/rGO and CuFe<sub>2</sub>O<sub>4</sub>/rGO/ $\gamma$ -CD

| Sample                                              | C At%  | O At%  | C/O  |
|-----------------------------------------------------|--------|--------|------|
| CuFe <sub>2</sub> O <sub>4</sub> /rGO               | 70.15% | 25.01% | 2.81 |
| CuFe <sub>2</sub> O <sub>4</sub> /rGO/ $\gamma$ -CD | 63.90% | 34.19% | 1.87 |

Table. S2 Atomic percentage of the components of O 1s, C 1s, Fe 2p, and Cu 2p

| Element | Chemical State / Assignment | CuFe <sub>2</sub> O <sub>4</sub> /rGO Atomic Percentage (At.%) | CuFe <sub>2</sub> O <sub>4</sub> /rGO/ $\gamma$ -CD Atomic Percentage (At.%) |
|---------|-----------------------------|----------------------------------------------------------------|------------------------------------------------------------------------------|
| C 1s    | C-C                         | 55.04%                                                         | 24.78%                                                                       |
|         | C-OH                        | 34.98%                                                         | 55.58%                                                                       |
|         | -COOH                       | 10.07%                                                         | 15.05%                                                                       |
|         | C=O                         | -                                                              | 19.64%                                                                       |
| O 1s    | Cu-O                        | 65.14%                                                         | -                                                                            |
|         | Fe-O                        | 34.86%                                                         | -                                                                            |
|         | Surface adsorbed -OH        | 56.51%                                                         | 100%                                                                         |
| Fe 2p   | Fe <sup>2+</sup>            | 39%                                                            | -                                                                            |
|         | Fe <sup>3+</sup>            | 61%                                                            | -                                                                            |
| Cu 2p   | Cu <sup>2+</sup>            | 51.92%                                                         | 77.09%                                                                       |
|         | satellite peaks             | 48.08%                                                         | 22.91%                                                                       |

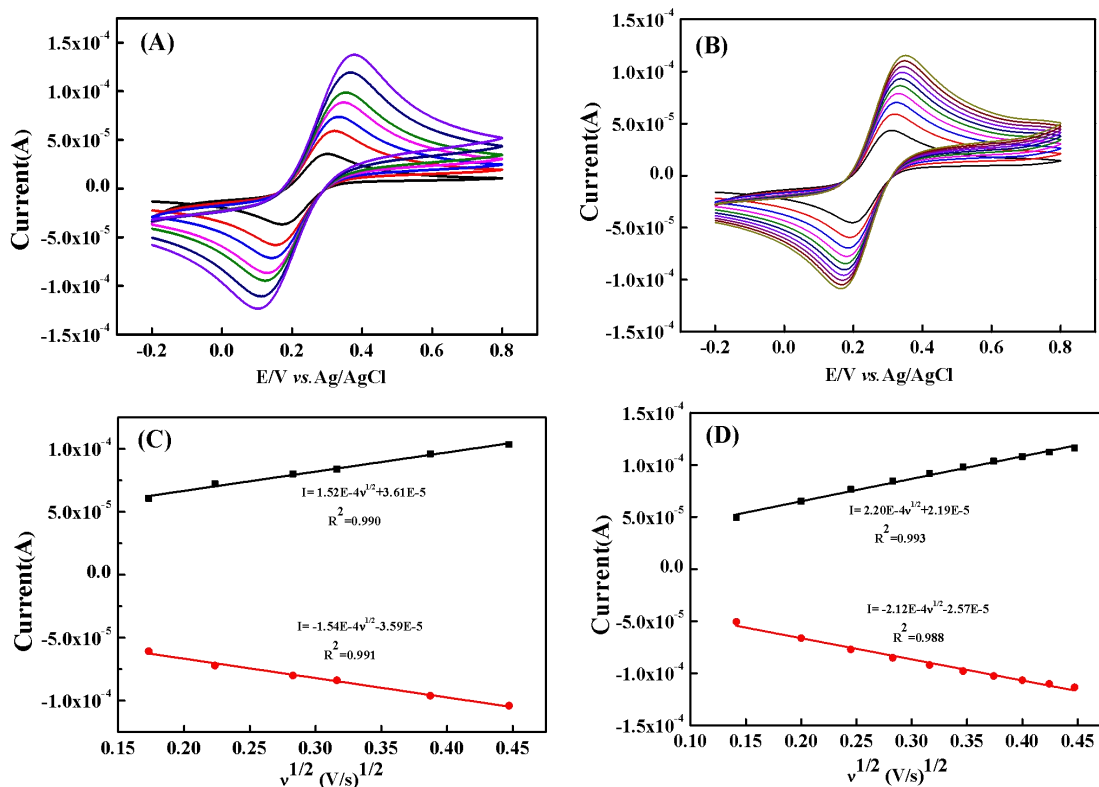

Fig. S2 CV curves of bare GCE (A) and CuFe<sub>2</sub>O<sub>4</sub>/rGO/GCE (B) with different scan rates ( $v$ ) in the presence of 5 mM [Fe(CN)<sub>6</sub>]<sup>3-/4-</sup> in 0.1 M KCl solution, The inset shows the variation of the peak redox current of bare GCE (C) and CuFe<sub>2</sub>O<sub>4</sub>/rGO/GCE (D) with the  $v^{1/2}$ .

The effective electrochemical surface areas (ECSA) of different electrode materials can be calculated according to Randles-Sevcik equation<sup>[3]</sup>:

$$I = 2.687 \times 10^5 n^{3/2} A D^{1/2} C v^{1/2}$$

where  $I$ ,  $n$ ,  $A$ ,  $D$ ,  $C$ , and  $v$  represent the peak current, the number of electrons ( $n=1$ ), ECSA (cm<sup>2</sup>), diffusion coefficient (7.2 × 10<sup>-6</sup> cm<sup>2</sup>/s), solution concentration (5 × 10<sup>-6</sup> mol/cm<sup>3</sup>) and scan rates (V/s), respectively. In this work, we used the slope of oxidation current for ECSA calculation (Fig. S2-Fig. S3). ECSA values were calculated to be 0.042 cm<sup>2</sup> for GCE, 0.057 cm<sup>2</sup> for CuFe<sub>2</sub>O<sub>4</sub>/rGO/γ-CD/GCE, 0.061 cm<sup>2</sup> for CuFe<sub>2</sub>O<sub>4</sub>/rGO/GCE, and 0.018 cm<sup>2</sup> for CuFe<sub>2</sub>O<sub>4</sub>/GCE.

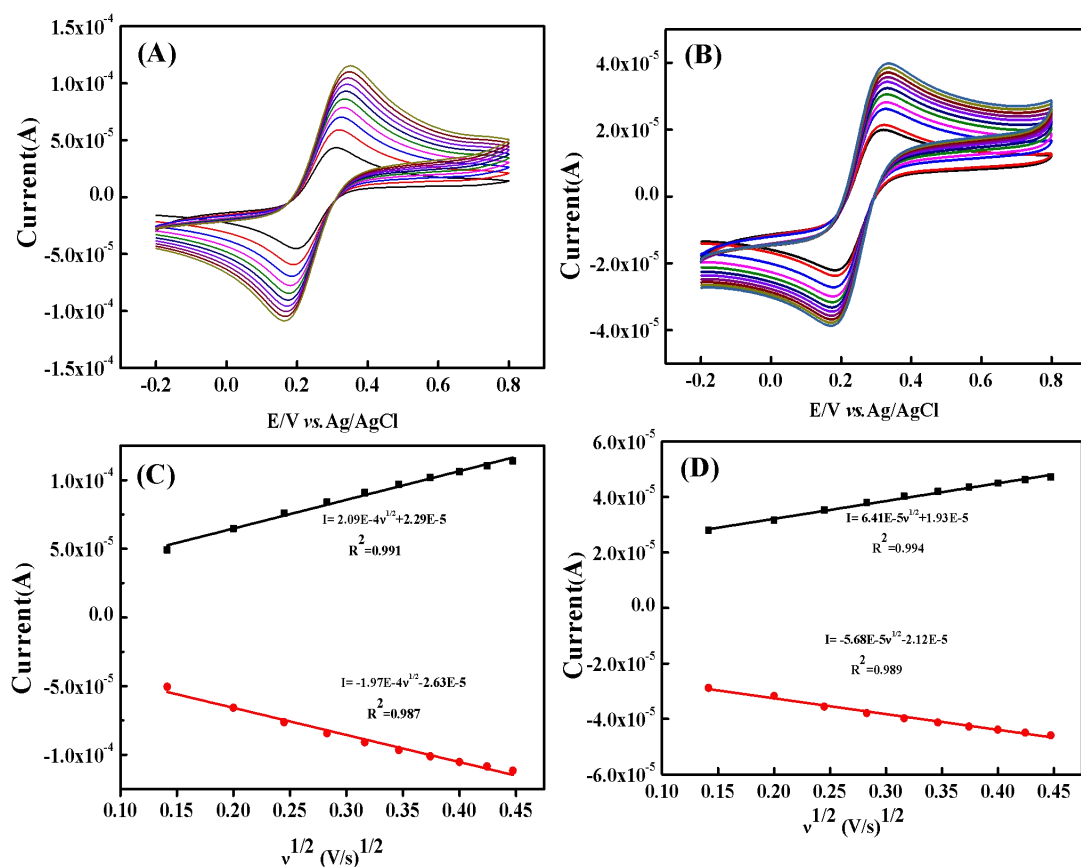

Fig. S3 CV curves of CuFe<sub>2</sub>O<sub>4</sub>/rGO/γ-CD/GCE (A) and CuFe<sub>2</sub>O<sub>4</sub>/GCE (B) with different scan rates ( $v$ ) in the presence of 5 mM [Fe(CN)<sub>6</sub>]<sup>3-/4-</sup> in 0.1 M KCl solution, The inset shows the variation of the peak redox current of CuFe<sub>2</sub>O<sub>4</sub>/rGO/γ-CD/GCE (C) and CuFe<sub>2</sub>O<sub>4</sub>/GCE (D) with the  $v^{1/2}$ .

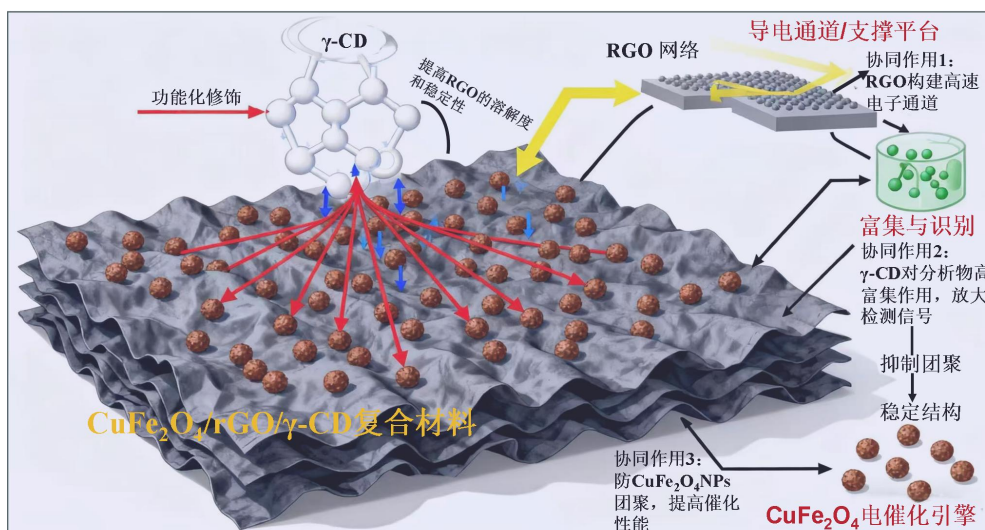

Fig. S4 Schematic diagram of the synergistic enhancement of electrochemical sensing performance by  $\text{CuFe}_2\text{O}_4/\text{rGO}/\gamma\text{-CD}$  nanocomposites

rGO, as a conductive substrate, provides a high-speed path for electron transport and prevents the agglomeration of  $\text{CuFe}_2\text{O}_4$  NPs.  $\text{CuFe}_2\text{O}_4$  NPs acts as a highly active catalyst, promoting the electron transfer reaction of analytes.  $\gamma\text{-CD}$  selectively enriches the target analyte through its cavity and "delivers" it to the vicinity of the catalytic site. The three work in synergy to jointly achieve highly sensitive and selective detection of analytes.

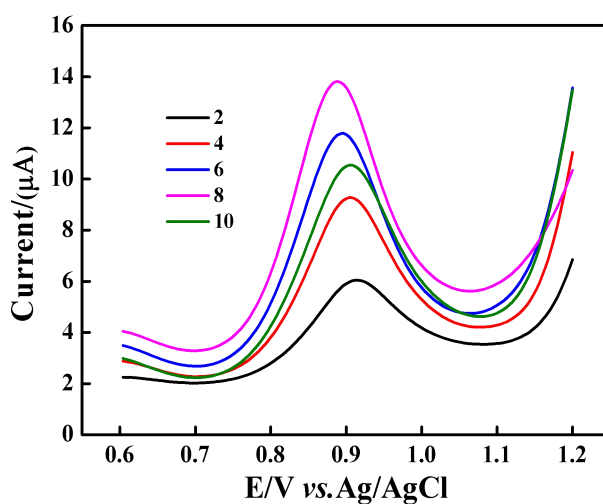

Fig. S5 The DPVs of different electrode modification amount

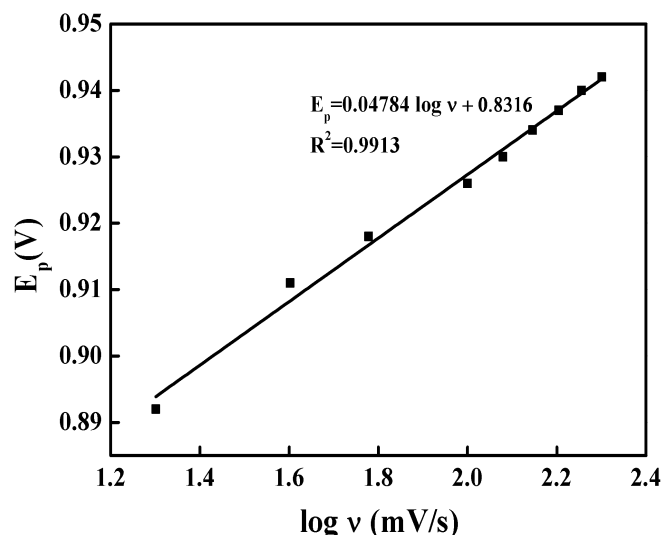

Fig. S6 Plot of the  $E_p$  versus  $\log v$

The electron transfer number ( $n$ ) and standard rate constant ( $k_s$ ) of the MET oxidation process can be estimated according to Laviron's equation<sup>[4,5]</sup>:

$$E_{pa} = E^{0'} + [2.303 RT / (1 - \alpha) n F] \log v + \text{constant} \quad (1)$$

$$\log k_s = \alpha \log (1 - \alpha) + (1 - \alpha) \log \alpha - \log (R T / n F) - (1 - \alpha) \alpha n F \Delta E_p / 2.3 R T \quad (2)$$

Where,  $E_{pa}$  is the peak potential,  $E^{0'}$  is the formal potential,  $R$  is the universal gas constant (8.314 J/mol.K),  $T$  is the absolute temperature (298.15 K),  $\alpha$  is the electron transfer coefficient,  $n$  is electron transfer number,  $F$  is Faraday's constant 96485 C mol<sup>-1</sup>),  $k_s$  is standard rate constant of the reaction,  $v$  is scan rate (V/s). From the slope of the plot in Fig.S6, the  $(1-\alpha)n$  values are obtained as 1.23. Considering  $\alpha$  equal to 0.50 (a value commonly assumed for organic compounds).<sup>[6,7]</sup> Thus, the values of  $n$  is estimated to be 2.46 and the  $n$  of analyte involved in the rate-determining step is 2, which is concordant with earlier studies.<sup>[8]</sup>  $E^{0'}$  is obtained from the intercept of the correlation between peak potential with respect to the scan rate of the measurements (plot is not shown)<sup>[9]</sup>. The value of  $E^{0'}$  obtained in this way is 0.899 V. From the intercept of the plot in Fig.S6, the value of  $k_s$  is calculated as 1.9 s<sup>-1</sup>.



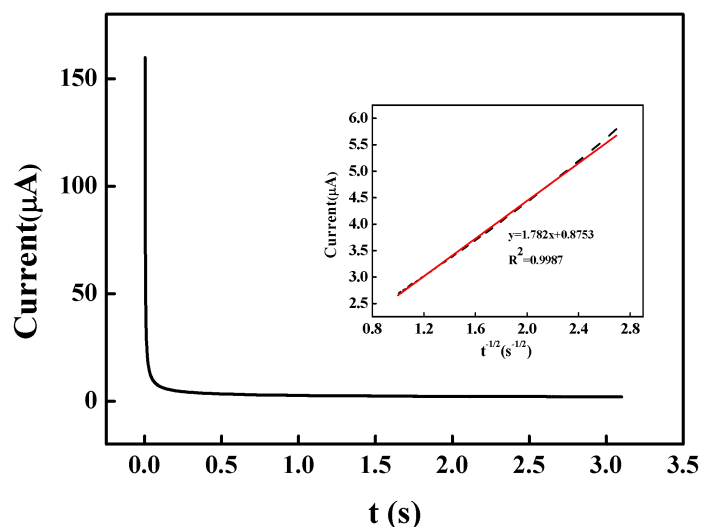

Fig. S7 The obtained chronoamperograms at CuFe<sub>2</sub>O<sub>4</sub>/rGO/γ-CD/GCE in a B-R buffer (0.1 M, pH 9) for 50 μM MET. Insets: Plots of I vs.  $t^{1/2}$  obtained from chronoamperograms.

Chronoamperometry was employed to further investigate the electrocatalytic performance of the CuFe<sub>2</sub>O<sub>4</sub>/rGO/γ-CD/GCE sensor towards MET. Figure S6 displays the chronoamperometric curves, with the inset showing the experimental plot of current (I) versus  $t^{1/2}$  along with the linear fitting result at a MET concentration of 50 μM.

Based on the Cottrell equation<sup>[10]</sup>, the diffusion coefficient of MET was calculated to be  $3.19 \times 10^{-5} \text{ cm}^2 \cdot \text{s}^{-1}$ . This diffusion coefficient value shows good agreement with the reported MET diffusion coefficients in the literature<sup>[11]</sup>, confirming the reliability of our calculation.

$$I = nFAD^{1/2}C_b\pi^{1/2}t^{-1/2} \quad (3)$$

Where, n is the electron transfer number, A is the electrode area, C<sub>b</sub> is the bulk concentration, F is the Faraday constant (96485 C/mol), and  $\pi^{1/2} \approx 0.5642$ .

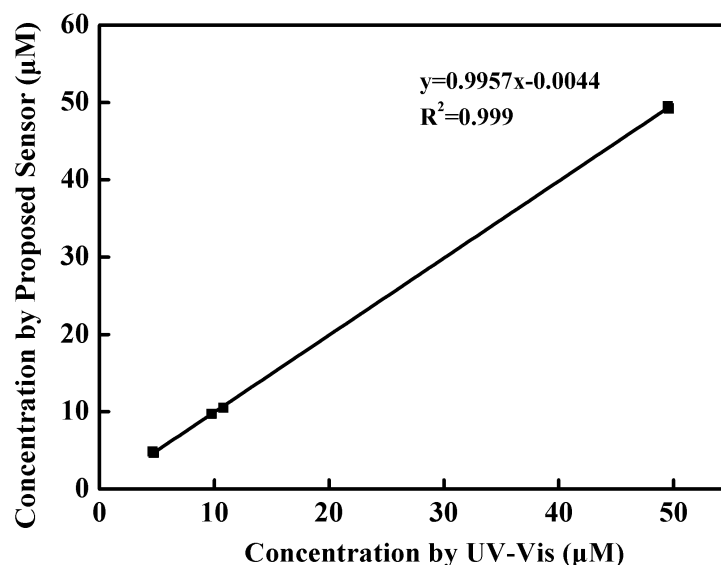

Fig. S8 Correlation between the Proposed Sensor and the Standard UV-Vis Method

Linear regression analysis of the results from all real samples (N=6) yielded a correlation equation of  $Y = 0.9957X - 0.0044$ , with a slope exceedingly close to 1 and an intercept exceedingly close to zero. This demonstrates near-perfect agreement between the proposed sensor and the standard method across the tested concentration range.

## References

- [1] P Lei, Y Zhou, R Q Zhu, et al. Facile synthesis of iron phthalocyanine functionalized N,B-doped reduced graphene oxide nanocomposites and sensitive electrochemical detection for glutathione. *Sensor. Actuat. B-Chem.*, 2019, 297,126756.
- [2] P Q Cao, L C Wang, Y J Xu, et al. Facile hydrothermal synthesis of mesoporous nickel oxide/reduced graphene oxide composites for high performance electrochemical supercapacitor. *Electrochim. Acta*, 2015, 157, 359-368.
- [3] P Gao, M Z Hussain, Z Y Zhou, et al. Zr-based metalloporphyrin MOF probe for electrochemical detection of parathion-methyl. *Biosens. Bioelectron.*, 2024, 261, 116515.

- [4] A Sudarvizhi, K Pandian, O S Oluwafemi, et al. Amperometry detection of nitrite in food samples using tetrasulfonated copper phthalocyanine modified glassy carbon electrode. *Sens. Actuators B Chem.*, 2018, 272, 151-159.
- [5] O J D'Souza, R J Mascarenhas, T Thomas, et al. Platinum decorated multi-walled carbon nanotubes/Triton X-100 modified carbon paste electrode for the sensitive amperometric determination of Paracetamol. *J. Electroanal. Chem.*, 2015, 739, 49-57.
- [6] P B Deroco, R C Rocha-Filho, O Fatibello-Filho, et al. A new and simple method for the simultaneous determination of amoxicillin and nimesulide using carbon black within a dihexadecyl phosphate film as electrochemical sensor. *Talanta*, 2018, 179, 115-123.
- [7] J J O'Dea, A Ribes, J G Osteryoung, et al. Square-wave voltammetry applied to the totally irreversible reduction of adsorbate. *J. Electroanal. Chem.*, 1993, 345, 287-301.
- [8] R Mirzajani, S. Karimi, et al. Preparation of  $\gamma$ -Fe<sub>2</sub>O<sub>3</sub>/hydroxyapatite/Cu (II) magnetic nanocomposite and its application for electrochemical detection of metformin in urine and pharmaceutical samples. *Sens. Actuators B Chem.*, 2018, 270, 405-416.
- [9] S. Sahoo, P.K. Sahoo, A. Sharma, et al. Satpati Interfacial polymerized RGO/MnFe<sub>2</sub>O<sub>4</sub>/polyaniline fibrous nanocomposite supported glassy carbon electrode for selective and ultrasensitive detection of nitrite. *Sens. Actuators B Chem.*, 2020, 309, 127763.
- [10] A J Bard, L R Faulkner, et al. Fundamentals and applications. *Electrochem. Methods*, second ed. Wiley, New York, 2001 (DOI).
- [11] N Sattarahmadya, H Heli, F. Faramarzi, et al. Nickel oxide nanotubes-carbon microparticles/naion nanocomposite for the electrooxidation and sensitive detection of metformin. *Talanta*, 2010, 82, 1126-1135.
